# Supplementary material
Source: publisher site journal article supplement (https://www.dovepress.com/article/307257)
Supplement: Supplementary file 1 [file get_supplementary_file.php]

**Table 1 S.** Primer sequences for quantitative real-time RNA.

| Genes | Forward primer | Reverse primer |
| --- | --- | --- |
| ACC | 5’-CTGCTGGAGACCGAAAGCTT-3’ | 5’-CAACATGGTGTCAGGACGTTCT-3’ |
| FAS | 5’-AGCCCCTCAAGTGCACAGTG-3’ | 5’-TGCCAATGTGTTTTCCCTGA-3’ |
| SREBP-1c | 5’-CCCTGCGAAGTGCTCACAA-3’ | 5’-GCGTTTCTACCACTTCAGGTTTCA-3’ |
| IL-6 | 5’-TGGTGATAAATCCCGATGAAG-3’ | 5’-GGCACTGAAACTCCTGGTCT-3’ |
| IL-8 | 5’-GGTAAAGTCCGTAAGTCGTAGTAC-3’ | 5’-AGTTAACGTGGAGGTACCGTA-3’ |
| CPT1 | 5’-ACCGCCACCTCTTCTGCCT-3’ | 5’-AGTTCCACCTGCTGCTGAG-3’ |
| NF-κB | 5’-AGCACCAAGACCGAAGCAA-3’ | 5’-TCTCCCGTA ACCGCGTAGTC-3’ |
| LPL | 5’-TTGCCCTAAGGACCCCTGAA-3’ | 5’-ACAGAGTCTGCTAATCCAGGAAT-3’ |
| PPARα | 5’-GGAAACTGCCGACCTCAAAT-3’ | 5’-AACGAAGGGCGGGTTATTG-3’ |
| GAPDH | 5’-TGTGTCCGTCGTGGATCTGA-3’ | 5’-CCTGCTTCACCACCTTCTTGAT-3’ |
